# Supplementary material for: Interleukin-13 Treatment of Living Lung Tissue Model Alters the Metabolome and Proteome—A Nano-DESI MS Metabolomics and Shotgun Proteomics Study
Source: MDPI journal article supplement (doi:10.3390/ijms25095034), 2024-05-05
Supplement: s1 [file s1]

# Supplementary information

To the article titled:

## **Interleukin-13 Treatment of Living Lung Tissue Model Alters the Metabolome and Proteome – a nano-DESI MS Metabolomics and Shotgun Proteomics Study**

Gábor Tóth<sup>1</sup>, Anastasia Golubova<sup>1</sup>, Alexander Falk<sup>1</sup>, Sara Bergström Lind<sup>1</sup>, Mark Nicholas<sup>2</sup>, Ingela Lanehoff<sup>1\*</sup>

1) Department of Chemistry-BMC, Uppsala University, Sweden

2) AstraZeneca R&D, Mölndal, Sweden

\*Correspondence: Ingela.Lanehoff@kemi.uu.se

### **Table of contents**

#### **1. Supplementary figures**

**Figure S1** Apical histamine signal as a function of basal histamine concentration.

**Figure S2** Intensity of histamine and methyl-histamine during drug exposure.

**Figure S3** Volcano plot of all quantified proteins with indication of highly differentially expressed proteins.

#### **2. Supplementary tables**

**Table S1** List of annotated endogenous metabolites and intensity ratios between the two sample groups at the given time points.

**Table S2** List of significantly upregulated proteins in the Treated sample group compared to Control.

**Table S3** List of significantly downregulated proteins in the Treated sample group compared to Control.

**Table S4** Uniquely detected proteins in Treated and Control sample groups.

## 1. Supplementary figures

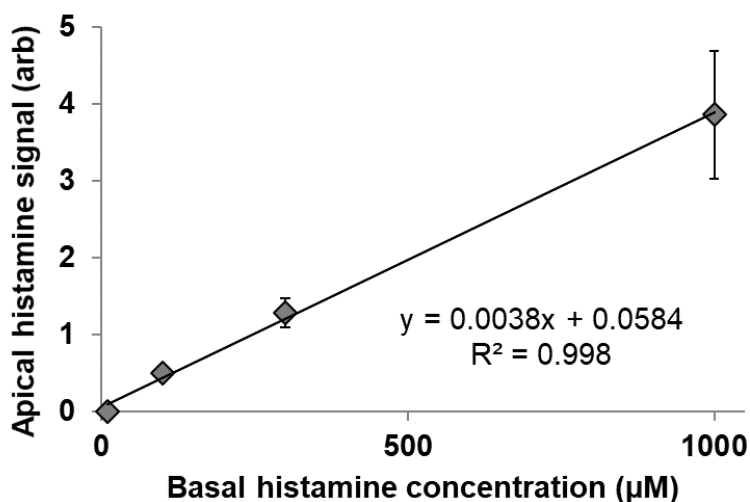

**Figure S1** Apical histamine signal as a function of basal histamine concentration. Since a linear function was observed, the transport can be assumed concentration-independent in the investigated concentration range.

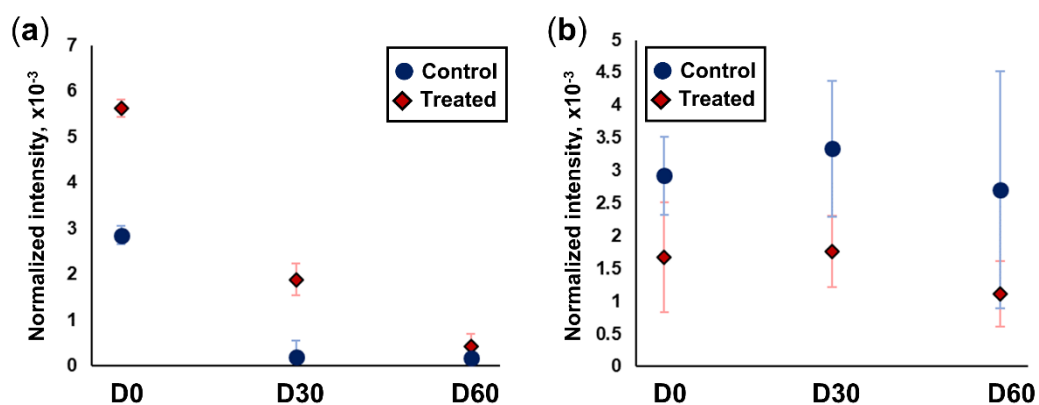

**Figure S2** Intensity of histamine (a) and methylhistamine (b) during drug exposure. Intensities normalized to the TIC are shown, and error bars represent standard deviation.

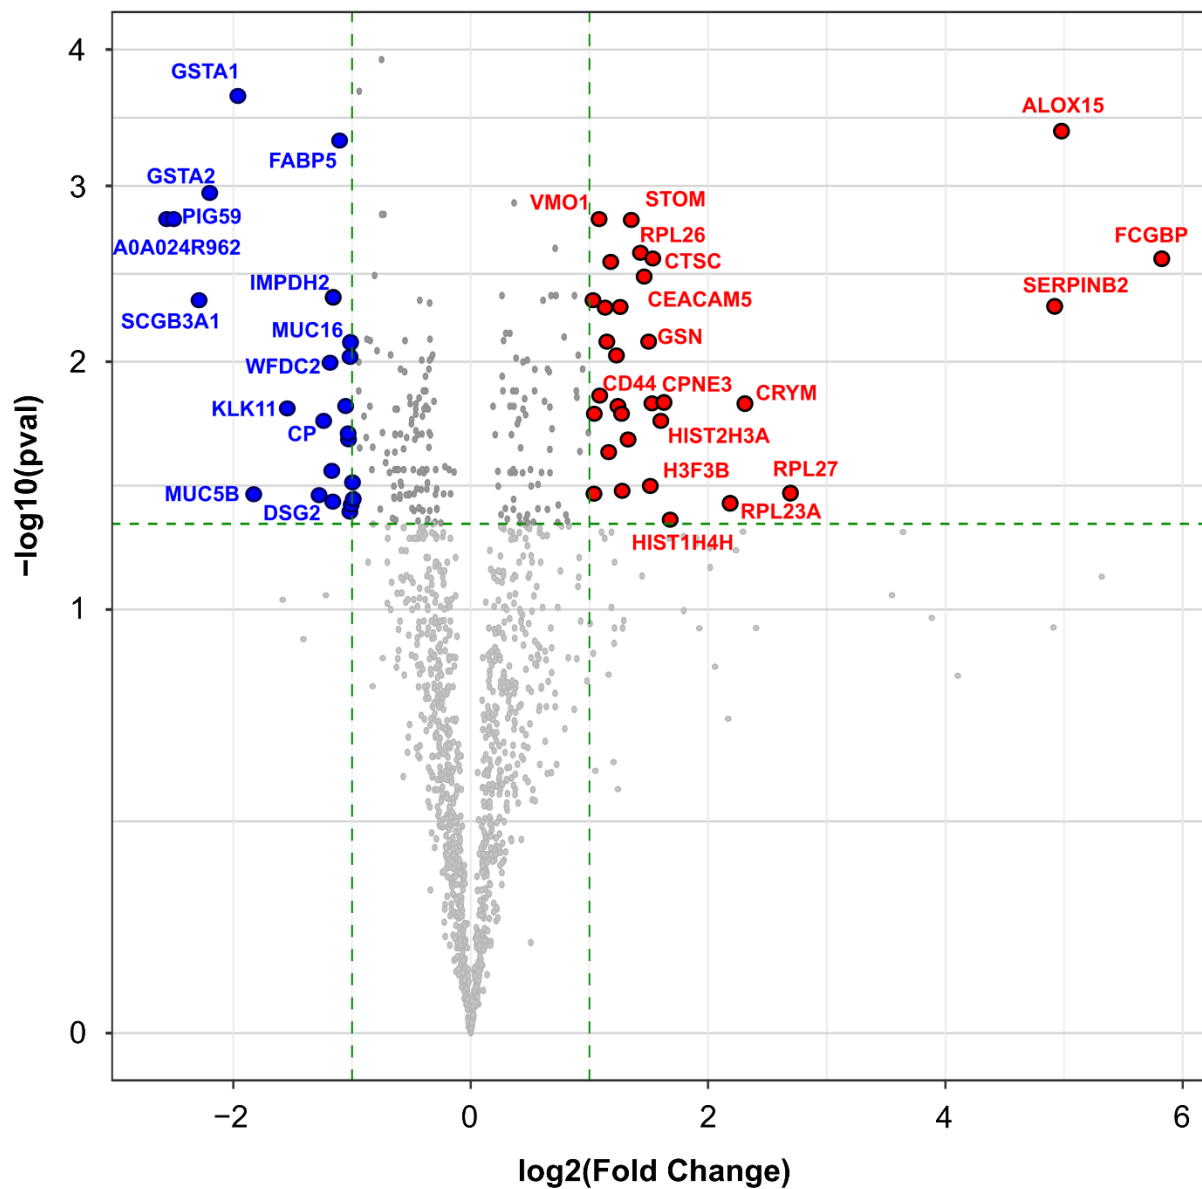

**Figure S3** Volcano plot of all quantified proteins with indication of highly differentially expressed proteins. The vertical dashed lines denote a 2-fold change while the horizontal dashed line denotes  $p = 0.05$  significance threshold. Blue – significantly lower in the Treated sample group, Red – significantly higher in the Treated sample group.

## 2. Supplementary tables

**Table S1** List of annotated endogenous metabolites and intensity ratios between the two sample groups (Treated *over* Control,  $I_T/I_C$ , [-]) at the given time points. (uC: uniquely detected in the Control sample group, uT: uniquely detected in the Treated sample group).

| Feautre                                                                 | H0   | H30  | H60  | D0   | D30  | D60  |
|-------------------------------------------------------------------------|------|------|------|------|------|------|
| [Phosphocholine] <sup>+</sup><br>or [Dehydroxycarnitine+K] <sup>+</sup> | 0.36 | 1.16 | 0.23 | 0.50 | 0.41 | 0.40 |
| [Creatinine+Na] <sup>+</sup>                                            | 0.46 | 0.45 | 0.45 | 0.43 | 0.31 | 0.56 |
| [Creatine+H] <sup>+</sup>                                               | uC   | 0.52 | 0.24 | uC   | 0.32 | 0.48 |
| [Creatine+Na] <sup>+</sup>                                              | uT   | 0.43 | 0.41 | 0.44 | 0.30 | 0.47 |
| [Creatine+K] <sup>+</sup>                                               | uT   | 0.56 | 0.37 | 0.52 | 0.33 | 0.62 |
| [Gln+H] <sup>+</sup>                                                    | 0.77 | 1.52 | 0.50 | 0.62 | 0.63 | 1.01 |
| [Gln+K] <sup>+</sup>                                                    | 0.79 | 1.92 | 0.70 | 0.86 | 0.86 | 1.22 |
| [Gln+Na] <sup>+</sup>                                                   | 1.15 | 1.20 | 0.95 | 0.71 | 0.83 | 1.00 |
| [Taurine+K] <sup>+</sup>                                                | 0.92 | 1.96 | 0.72 | 0.97 | 0.79 | 1.21 |
| [Leu/Ile+Na] <sup>+</sup>                                               | 0.93 | 0.93 | 2.43 | 1.37 | 1.67 | 1.61 |
| [Choline] <sup>+</sup>                                                  | 1.28 | 0.92 | 1.08 | 1.38 | 1.44 | 1.07 |
| [Trp+Na] <sup>+</sup>                                                   | 1.34 | 1.55 | 1.19 | 1.04 | 1.18 | 1.11 |
| [Taurine+Na] <sup>+</sup>                                               | 1.49 | 1.31 | 0.99 | 0.80 | 0.66 | 0.86 |
| [Lys+H] <sup>+</sup>                                                    | 1.93 | 1.14 | 1.10 | 1.11 | 1.23 | 1.22 |
| [Pro+Na] <sup>+</sup>                                                   | 3.14 | 1.02 | 1.16 | 0.88 | 0.99 | 0.73 |
| [Hypoxanthine+K] <sup>+</sup>                                           | 5.16 | 1.63 | 1.23 | 2.84 | 1.36 | uT   |
| [Hypoxanthine+Na] <sup>+</sup>                                          | uT   | 1.55 | uT   | 3.99 | 1.45 | 1.57 |
| [Tyr+Na] <sup>+</sup>                                                   | uT   | 0.71 | 1.21 | 1.03 | 1.39 | 1.17 |
| [His+H] <sup>+</sup>                                                    | 1.26 | 1.75 | 0.86 | 0.85 | 0.86 | 1.37 |
| [His+Na] <sup>+</sup>                                                   | uT   | 0.90 | 1.56 | 0.99 | 1.37 | 1.25 |
| [Adenine+H] <sup>+</sup>                                                | uT   | 1.00 | 0.94 | 1.53 | 1.12 | 0.80 |
| [Val+Na] <sup>+</sup><br>or [Betaine+Na] <sup>+</sup>                   | uT   | 1.22 | 2.48 | 1.41 | 1.65 | uT   |
| [Glucose+K] <sup>+</sup>                                                | 1.12 | 1.20 | 1.12 | 1.42 | 1.09 | 1.74 |
| [Glucose+Na] <sup>+</sup>                                               | uT   | 1.23 | 1.44 | 1.24 | 1.26 | 1.25 |
| [Ser+Na] <sup>+</sup>                                                   | uT   | 1.31 | 1.22 | 1.05 | 0.91 | 1.37 |
| [Oxoproline+H] <sup>+</sup>                                             | uT   | 1.39 | 0.56 | uC   | 0.82 | 0.96 |
| [Oxoproline+Na] <sup>+</sup>                                            | 1.19 | 1.21 | 0.98 | 0.72 | 0.93 | 0.97 |
| [Oxoproline+K] <sup>+</sup>                                             | uT   | 2.09 | 0.77 | 1.15 | 1.05 | 1.22 |
| [GPC+H] <sup>+</sup>                                                    | uT   | 2.55 | 0.58 | 2.54 | 1.07 | 1.35 |
| [GPC+K] <sup>+</sup>                                                    | 1.26 | 3.08 | 1.35 | 1.87 | 1.25 | 1.84 |
| [GPC+Na] <sup>+</sup>                                                   | 1.74 | 2.07 | 1.49 | 1.07 | 1.27 | 1.68 |
| [Pro+K] <sup>+</sup>                                                    | uT   | uT   | 1.08 | uC   | 0.96 | 1.08 |
| [Thr+Na] <sup>+</sup>                                                   | uT   | uT   | 1.62 | 1.27 | 1.18 | 1.64 |
| [Met+Na] <sup>+</sup>                                                   | uT   | uT   | uT   | 1.21 | 1.16 | uT   |
| [Phe+Na] <sup>+</sup>                                                   | 1.80 | 1.18 | 1.72 | 1.26 | 1.57 | 1.41 |
| [Phe+K] <sup>+</sup>                                                    | uT   | uT   | uT   | uC   | 1.11 | uT   |
| [Arg+H] <sup>+</sup>                                                    | 2.95 | 2.11 | 2.25 | 1.38 | 1.93 | 2.21 |
| [Cit+K] <sup>+</sup>                                                    | uT   | uT   | uT   | uT   | uT   | uT   |
| [Cit+Na] <sup>+</sup>                                                   | uT   | uT   | uT   | uT   | uT   | uT   |

### Supplementary information

Tóth, G et al. Interleukin-13 treatment of living lung tissue model alters the metabolome and proteome – a nano-DESI MS Metabolomics and Shotgun Proteomics Study

**Table S2** List of significantly upregulated proteins (FC>2, BH-corrected p-value < 0.05) in the Treated sample group compared to Control.

| Protein name                                              | Gene name | Fold Change<br>(Treated vs<br>Control) | p-value |
|-----------------------------------------------------------|-----------|----------------------------------------|---------|
| IgGf binding protein                                      | FCGBP     | 54.7                                   | 0.0026  |
| Arachidonate 15 lipoxygenase                              | ALOX15    | 30.5                                   | 0.0004  |
| Plasminogen activator inhibitor 2                         | SERPINB2  | 29.3                                   | 0.0049  |
| 60S ribosomal protein L27                                 | RPL27     | 6.3                                    | 0.0363  |
| Ketimine reductase, $\mu$ -Crystallin                     | CRYM      | 4.8                                    | 0.0150  |
| 60S ribosomal protein L23a                                | RPL23A    | 4.4                                    | 0.0399  |
| Histone H4                                                | HIST1H4H  | 3.2                                    | 0.0463  |
| Copine 3                                                  | CPNE3     | 3.0                                    | 0.0148  |
| Histone H3 2                                              | HIST2H3A  | 3.0                                    | 0.0180  |
| CD44 antigen                                              | CD44      | 2.8                                    | 0.0150  |
| Dipeptidyl peptidase 1                                    | CTSC      | 2.8                                    | 0.0026  |
| Histone H3 1                                              | H3F3B     | 2.8                                    | 0.0341  |
| Gelsolin                                                  | GSN       | 2.7                                    | 0.0075  |
| Carcinoembryonic antigen related cell adhesion molecule 5 | CEACAM5   | 2.7                                    | 0.0034  |
| 60S ribosomal protein L26                                 | RPL26     | 2.7                                    | 0.0024  |
| Erythrocyte band 7 integral membrane protein              | STOM      | 2.5                                    | 0.0015  |
| Histone H3 1                                              | HIST1H3A  | 2.4                                    | 0.0218  |
| 40S ribosomal protein S13                                 | RPS13     | 2.4                                    | 0.0357  |
| Small nuclear ribonucleoprotein Sm D1                     | SNRPD1    | 2.3                                    | 0.0167  |
| 60S ribosomal protein L32                                 | RPL32     | 2.3                                    | 0.0049  |
| 60S ribosomal protein L14                                 | RPL14     | 2.3                                    | 0.0154  |
| Tetraspanin                                               | CD9       | 2.3                                    | 0.0088  |
| Annexin 3                                                 | HEL.S.274 | 2.2                                    | 0.0028  |
| 40S ribosomal protein S24                                 | RPS24     | 2.2                                    | 0.0247  |
| Plastin 1                                                 | PLS1      | 2.1                                    | 0.0075  |
| Galectin                                                  | hCG_22119 | 2.1                                    | 0.0050  |
| Beta galactoside alpha 2,6 sialyltransferase 1            | ST6GAL1   | 2.1                                    | 0.0138  |
| Vitelline membrane outer layer protein 1 homolog          | VMO1      | 2.0                                    | 0.0015  |
| ATP dependent 6 phosphofructokinase platelet type         | PFKP      | 2.0                                    | 0.0167  |
| 40S ribosomal protein S25                                 | RPS25     | 2.0                                    | 0.0367  |
| Complement factor B                                       | CFB       | 2.0                                    | 0.0045  |

### Supplementary information

Tóth, G et al. Interleukin-13 treatment of living lung tissue model alters the metabolome and proteome – a nano-DESI MS Metabolomics and Shotgun Proteomics Study

**Table S3** List of significantly downregulated proteins (FC<0.5, BH-corrected p-value < 0.05) in the Treated sample group compared to Control. In the third column, the reciprocal of the FC value is displayed for each protein.

| Protein name                                          | Gene name  | Fold Change<br>(Control vs Treated) | p-value |
|-------------------------------------------------------|------------|-------------------------------------|---------|
| Complement factor H                                   | A0A024R962 | 6.10                                | 0.0015  |
| Glutamine synthetase                                  | PIG59      | 5.76                                | 0.0015  |
| Secretoglobin family 3A member 1                      | SCGB3A1    | 5.05                                | 0.0045  |
| Glutathione S transferase                             |            | 4.66                                | 0.0010  |
| Glutathione S transferase A1                          | GSTA1      | 3.96                                | 0.0002  |
| Mucin 5B                                              | MUC5B      | 3.67                                | 0.0368  |
| Kallikrein 11                                         | KLK11      | 3.02                                | 0.0158  |
| Desmoglein 2                                          | DSG2       | 2.51                                | 0.0372  |
| Ceruloplasmin                                         | CP         | 2.44                                | 0.0180  |
| WAP four disulfide core domain<br>protein 2           | WFDC2      | 2.35                                | 0.0096  |
| Transmembrane channel like<br>protein 1               | TMC5       | 2.33                                | 0.0296  |
| Prolactin inducible protein                           | PIP        | 2.31                                | 0.0394  |
| Inosine 5 monophosphate<br>dehydrogenase 2            | IMPDH2     | 2.31                                | 0.0045  |
| Fatty acid binding protein<br>epidermal               | FABP5      | 2.18                                | 0.0005  |
| Prominin 1                                            | CD133      | 2.15                                | 0.0154  |
| Calcium and integrin binding<br>protein 1             | CIB1       | 2.11                                | 0.0205  |
| Latexin                                               | LXN        | 2.08                                | 0.0405  |
| Sulfhydryl oxidase 1                                  | QSOX1      | 2.05                                | 0.0090  |
| Retinoic acid receptor responder<br>protein 1         | RARRES1    | 2.05                                | 0.0385  |
| Mucin 16                                              | MUC16      | 2.05                                | 0.0078  |
| EH domain containing protein 4                        | EHD4       | 2.02                                | 0.0431  |
| Bifunctional ATP dependent<br>dihydroxyacetone kinase | DAK        | 2.00                                | 0.0218  |

**Supplementary information**

*Tóth, G et al. Interleukin-13 treatment of living lung tissue model alters the metabolome and proteome – a nano-DESI MS Metabolomics and Shotgun Proteomics Study*

**Table S4** Uniquely detected proteins in Treated and Control sample groups.

| <b>TREATED</b>                                                 |                                  |                          |
|----------------------------------------------------------------|----------------------------------|--------------------------|
| <b>Protein names</b>                                           | <b>Number of unique peptides</b> | <b>Average LFQ value</b> |
| Nitric oxide synthase, inducible                               | 23                               | 1.99E+08                 |
| Serpin B10                                                     | 20                               | 6.51E+08                 |
| UDP-N-acetylglucosamine pyrophosphorylase                      | 16                               | 2.24E+08                 |
| Histone H1.0, N-terminally processed                           | 15                               | 4.81E+08                 |
| Histone H1.2                                                   | 14                               | 2.67E+08                 |
| Protein-glutamine gamma-glutamyltransferase 2                  | 14                               | 1.34E+08                 |
| Dehydrogenase/reductase SDR family member 7                    | 13                               | 1.31E+08                 |
| Fetuin-B                                                       | 13                               | 1.11E+08                 |
| Cystatin-SN                                                    | 12                               | 6.32E+09                 |
| 60S ribosomal protein L19                                      | 11                               | 2.36E+08                 |
| Solute carrier family 12 member 2                              | 11                               | 8.94E+07                 |
| Alkaline phosphatase                                           | 10                               | 1.83E+08                 |
| 60S ribosomal protein, L36a-like                               | 8                                | 1.17E+08                 |
| Multidrug resistance-associated protein 1                      | 8                                | 3.96E+07                 |
| Carbonic anhydrase 2                                           | 7                                | 6.99E+07                 |
| DCC-interacting protein 13-beta                                | 6                                | 1.12E+08                 |
| 15-hydroxyprostaglandin dehydrogenase [NAD(+)]                 | 6                                | 9.64E+07                 |
| Lysyl oxidase homolog 4                                        | 6                                | 8.81E+07                 |
| Carbohydrate sulfotransferase 4                                | 5                                | 5.66E+07                 |
| Dimethylaniline monooxygenase, N-oxide-forming                 | 4                                | 4.88E+07                 |
| Peroxisomal membrane protein 11B                               | 4                                | 1.94E+07                 |
| <b>CONTROL</b>                                                 |                                  |                          |
| <b>Protein names</b>                                           | <b>Number of unique peptides</b> | <b>Average LFQ value</b> |
| Outer dense fiber protein 3B                                   | 9                                | 6.27E+07                 |
| Disintegrin and metalloproteinase domain-containing protein 10 | 8                                | 6.76E+07                 |
| Plakophilin-2                                                  | 8                                | 3.87E+07                 |
| SAFB-like transcription modulator                              | 7                                | 3.50E+07                 |
